# Supplementary material for: Substrate-analogous inhibitors exert antimalarial action by targeting the Plasmodium lactate transporter PfFNT at nanomolar scale
Source: PubMed Central journal article supplement (PMC5298233; doi:10.1371/journal.ppat.1006172), 2017-02-08
Supplement: ppat.1006172.s001.pdf [file ppat.1006172.s001.pdf]

**S1 Table** *Malaria* box compound screening. The hit compounds exhibiting full inhibition of PfFNT at 10  $\mu$ M are MMV007839 (plate BFD0011398, B7) and MMV000972 (plate BFD0011568, C6), and labeled red.

| Plate<br>BFD0011398 |          |      |          |           |             |      |          |
|---------------------|----------|------|----------|-----------|-------------|------|----------|
| Pos.                | % Inhib. | Pos. | % Inhib. | Pos.      | % Inhib.    | Pos. | % Inhib. |
| A1                  | 0.2      | A4   | 22.8     | A7        | 3.8         | A10  | 8.0      |
| B1                  | -3.2     | B4   | 4.7      | <b>B7</b> | <b>99.1</b> | B10  | -8.9     |
| C1                  | -16.0    | C4   | 2.6      | C7        | -14.3       | C10  | -12.4    |
| D1                  | 2.4      | D4   | 22.5     | D7        | 18.2        | D10  | 15.3     |
| E1                  | -7.6     | E4   | 27.7     | E7        | 19.5        | E10  | -4.4     |
| F1                  | -18.6    | F4   | 6.8      | F7        | -2.8        | F10  | -8.3     |
| G1                  | 8.8      | G4   | 18.5     | G7        | 13.5        | G10  | 6.9      |
| H1                  | 18.3     | H4   | 28.5     | H7        | 15.3        | H10  | -4.6     |
| A2                  | -8.4     | A5   | 4.0      | A8        | -3.1        | A11  | -11.7    |
| B2                  | 10.8     | B5   | 31.5     | B8        | 25.0        | B11  | 20.8     |
| C2                  | 16.6     | C5   | 28.9     | C8        | 20.0        | C11  | 14.5     |
| D2                  | -8.6     | D5   | 0.5      | D8        | -7.7        | D11  | -16.0    |
| E2                  | -6.8     | E5   | 1.6      | E8        | 12.4        | E11  | 37.1     |
| F2                  | 16.2     | F5   | -6.4     | F8        | 21.6        | F11  | -0.7     |
| G2                  | -2.8     | G5   | -26.1    | G8        | -4.7        | G11  | -18.8    |
| H2                  | 17.6     | H5   | 7.5      | H8        | 38.8        | H11  | 14.0     |
| A3                  | 21.8     | A6   | 3.8      | A9        | 8.5         | A12  | 19.2     |
| B3                  | -6.4     | B6   | -9.1     | B9        | -1.4        | B12  | -27.7    |
| C3                  | 16.3     | C6   | 8.0      | C9        | 28.4        | C12  | 12.7     |
| D3                  | 18.3     | D6   | 5.7      | D9        | 19.2        | D12  | 6.1      |
| E3                  | 8.8      | E6   | -7.5     | E9        | 5.7         | E12  | -19.9    |
| F3                  | 30.1     | F6   | 8.2      | F9        | 17.8        | F12  | 8.0      |
| G3                  | 19.6     | G6   | 11.4     | G9        | 31.1        | G12  | 22.5     |
| H3                  | -12.3    | H6   | -15.9    | H9        | 11.9        | H12  | -3.4     |

| Plate<br>BFD0011448 |          |      |          |      |          |      |          |
|---------------------|----------|------|----------|------|----------|------|----------|
| Pos.                | % Inhib. | Pos. | % Inhib. | Pos. | % Inhib. | Pos. | % Inhib. |
| A1                  | 9.9      | A4   | 31.3     | A7   | 21.6     | A10  | 22.8     |
| B1                  | -2.2     | B4   | 32.1     | B7   | -10.4    | B10  | 8.3      |
| C1                  | -18.2    | C4   | 11.1     | C7   | 21.3     | C10  | -17.3    |
| D1                  | 14.2     | D4   | 37.4     | D7   | 15.8     | D10  | 16.1     |
| E1                  | 16.6     | E4   | 27.1     | E7   | 0.9      | E10  | 8.0      |
| F1                  | -5.6     | F4   | 12.3     | F7   | 19.6     | F10  | -15.9    |
| G1                  | 36.4     | G4   | 37.2     | G7   | 15.1     | G10  | 22.4     |
| H1                  | 27.7     | H4   | 7.8      | H7   | -1.2     | H10  | 8.0      |
| A2                  | 5.8      | A5   | 10.0     | A8   | 27.4     | A11  | -13.2    |
| B2                  | 27.7     | B5   | 47.2     | B8   | 26.4     | B11  | 20.8     |
| C2                  | 10.3     | C5   | 36.9     | C8   | 14.5     | C11  | 27.9     |
| D2                  | 1.3      | D5   | 14.5     | D8   | 27.4     | D11  | -6.6     |
| E2                  | 28.5     | E5   | 34.8     | E8   | 27.0     | E11  | 20.1     |
| F2                  | 20.5     | F5   | 37.1     | F8   | -13.1    | F11  | 11.1     |
| G2                  | -3.4     | G5   | 3.9      | G8   | 28.6     | G11  | -10.3    |
| H2                  | 30.1     | H5   | 32.6     | H8   | 23.0     | H11  | 25.9     |
| A3                  | 29.0     | A6   | 36.1     | A9   | 3.6      | A12  | 19.2     |
| B3                  | -0.8     | B6   | 15.5     | B9   | 34.7     | B12  | -14.5    |
| C3                  | 30.5     | C6   | 11.2     | C9   | 26.2     | C12  | 31.1     |
| D3                  | 29.0     | D6   | -4.1     | D9   | 12.9     | D12  | 47.3     |
| E3                  | 1.3      | E6   | 18.9     | E9   | 31.3     | E12  | 28.5     |
| F3                  | 31.8     | F6   | 14.5     | F9   | 26.2     | F12  | 24.8     |
| G3                  | 21.5     | G6   | 0.7      | G9   | 7.8      | G12  | 18.4     |
| H3                  | 7.6      | H6   | 24.0     | H9   | 30.4     | H12  | 0.5      |

| Plate<br>BFD0011518 |          |      |          |      |          |      |          |
|---------------------|----------|------|----------|------|----------|------|----------|
| Pos.                | % Inhib. | Pos. | % Inhib. | Pos. | % Inhib. | Pos. | % Inhib. |
| A1                  | -0.4     | A4   | 13.3     | A7   | 14.5     | A10  | 22.9     |
| B1                  | -27.6    | B4   | -7.9     | B7   | 2.1      | B10  | 12.3     |
| C1                  | -3.7     | C4   | 8.8      | C7   | 23.1     | C10  | -13.8    |
| D1                  | 0.7      | D4   | 13.8     | D7   | 27.6     | D10  | 18.6     |
| E1                  | -22.7    | E4   | 1.5      | E7   | 5.7      | E10  | 3.7      |
| F1                  | 2.1      | F4   | 17.8     | F7   | -46.7    | F10  | -16.4    |
| G1                  | -0.6     | G4   | 11.4     | G7   | -17.6    | G10  | 31.8     |
| H1                  | -19.7    | H4   | -7.1     | H7   | -5.4     | H10  | 7.9      |
| A2                  | 3.3      | A5   | 9.1      | A8   | -18.7    | A11  | -39.8    |
| B2                  | 8.2      | B5   | 8.3      | B8   | 0.7      | B11  | 23.3     |
| C2                  | -20.5    | C5   | -6.8     | C8   | -1.1     | C11  | 4.6      |
| D2                  | 7.8      | D5   | 19.5     | D8   | -21.5    | D11  | -24.4    |
| E2                  | -7.6     | E5   | 15.9     | E8   | 7.9      | E11  | 17.6     |
| F2                  | -13.6    | F5   | -7.3     | F8   | 5.5      | F11  | 14.7     |
| G2                  | 3.2      | G5   | -6.3     | G8   | -13.2    | G11  | -4.8     |
| H2                  | -1.6     | H5   | 8.6      | H8   | -1.4     | H11  | 26.8     |
| A3                  | -14.3    | A6   | 4.6      | A9   | -3.8     | A12  | 6.6      |
| B3                  | 9.7      | B6   | 23.1     | B9   | -15.5    | B12  | 2.3      |
| C3                  | -19.4    | C6   | 16.6     | C9   | 12.4     | C12  | 18.5     |
| D3                  | -12.5    | D6   | 2.2      | D9   | 0.2      | D12  | 0.6      |
| E3                  | 7.7      | E6   | 22.5     | E9   | -13.3    | E12  | 5.3      |
| F3                  | 13.9     | F6   | 20.3     | F9   | 12.7     | F12  | 20.4     |
| G3                  | -11.9    | G6   | -6.8     | G9   | -2.7     | G12  | 24.8     |
| H3                  | 12.2     | H6   | 28.4     | H9   | -15.0    | H12  | 21.6     |

| Plate<br>BFD0011568 |          |           |              |      |          |      |          |
|---------------------|----------|-----------|--------------|------|----------|------|----------|
| Pos.                | % Inhib. | Pos.      | % Inhib.     | Pos. | % Inhib. | Pos. | % Inhib. |
| A1                  | 0.4      | A4        | 12.1         | A7   | 28.4     | A10  | 54.1     |
| B1                  | -26.9    | B4        | 5.5          | B7   | 13.1     | B10  | 5.1      |
| C1                  | -1.9     | C4        | 17.5         | C7   | 41.5     | C10  | -9.4     |
| D1                  | 6.0      | D4        | 13.5         | D7   | 34.9     | D10  | 7.8      |
| E1                  | -11.6    | E4        | 5.7          | E7   | 19.8     | E10  | 5.2      |
| F1                  | 19.5     | F4        | 27.8         | F7   | 37.2     | F10  | -8.9     |
| G1                  | 3.6      | G4        | 22.8         | G7   | 33.5     | G10  | 15.4     |
| H1                  | -17.3    | H4        | 1.9          | H7   | 10.7     | H10  | -1.4     |
| A2                  | 10.3     | A5        | 20.9         | A8   | 47.2     | A11  | -2.7     |
| B2                  | 4.3      | B5        | 20.0         | B8   | 35.5     | B11  | 9.7      |
| C2                  | -11.8    | C5        | -2.8         | C8   | 16.4     | C11  | 15.2     |
| D2                  | 19.7     | D5        | 32.5         | D8   | 37.8     | D11  | 0.9      |
| E2                  | 3.3      | E5        | 30.4         | E8   | 18.9     | E11  | 22.6     |
| F2                  | -16.1    | F5        | 21.6         | F8   | 11.2     | F11  | 17.9     |
| G2                  | 24.1     | G5        | 38.9         | G8   | 43.0     | G11  | -9.8     |
| H2                  | 21.9     | H5        | 31.5         | H8   | 36.8     | H11  | 25.1     |
| A3                  | -10.4    | A6        | 14.6         | A9   | 24.2     | A12  | 16.3     |
| B3                  | 21.7     | B6        | 32.9         | B9   | 36.6     | B12  | -4.7     |
| C3                  | 22.1     | <b>C6</b> | <b>101.7</b> | C9   | 30.9     | C12  | 24.6     |
| D3                  | 6.0      | D6        | 17.3         | D9   | 19.5     | D12  | 24.7     |
| E3                  | 20.0     | E6        | 31.6         | E9   | 42.6     | E12  | -0.7     |
| F3                  | 10.8     | F6        | 9.3          | F9   | 42.5     | F12  | 27.0     |
| G3                  | -0.7     | G6        | 21.1         | G9   | 22.2     | G12  | 28.9     |
| H3                  | 19.5     | H6        | 38.7         | H9   | -26.1    | H12  | -8.2     |

---

|            |          |
|------------|----------|
| Plate      |          |
| BFD0011618 |          |
| Pos.       | % Inhib. |

---

|    |      |
|----|------|
| A1 | 27.1 |
| B1 | 21.8 |
| C1 | 3.4  |
| D1 | 16.1 |
| E1 | 15.6 |
| F1 | 0.0  |

---
