# Supplementary material for: Substrate-analogous inhibitors exert antimalarial action by targeting the Plasmodium lactate transporter PfFNT at nanomolar scale
Source: PubMed Central journal article supplement (PMC5298233; doi:10.1371/journal.ppat.1006172), 2017-02-08
Supplement: ppat.1006172.s002.pdf [file ppat.1006172.s002.pdf]

**S2 Table.** Primer sequences for site-directed mutagenesis of BbFNT and codon-optimized PfFNT; the mutating codon is highlighted.

| <b>Mutation</b> | <b>Primer</b>                                      |
|-----------------|----------------------------------------------------|
| BbFNT_S93G_fw   | ACC GAC CTA GTC ACA <b>GGC</b> AAT TGT ATG AAC TTT |
| BbFNT_S93G_rev  | TGT GAC TAG GTC GGT ACC AGT GAA TAC GAT            |
| PfFNT_G107S_fw  | TCG GAT TTG TTT ACC <b>AGT</b> AAT ACA CTA GCG GTC |
| PfFNT_G107A_fw  | TCG GAT TTG TTT ACC <b>GCT</b> AAT ACA CTA GCG GTC |
| PfFNT_G107C_fw  | TCG GAT TTG TTT ACC <b>TGT</b> AAT ACA CTA GCG GTC |
| PfFNT_G107V_fw  | TCG GAT TTG TTT ACC <b>GTT</b> AAT ACA CTA GCG GTC |
| PfFNT_G107X_rev | GGT AAA CAA ATC CGA ACC GGT ACA GAT GAT            |
