# Supplementary material for: Substrate-analogous inhibitors exert antimalarial action by targeting the Plasmodium lactate transporter PfFNT at nanomolar scale
Source: PubMed Central journal article supplement (PMC5298233; doi:10.1371/journal.ppat.1006172), 2017-02-08
Supplement: ppat.1006172.s003.pdf [file ppat.1006172.s003.pdf]

**S3 Table.** CAS numbers of the commercially available PfFNT inhibitors

| <b>Compound</b>                                                 | <b>#</b>        |
|-----------------------------------------------------------------|-----------------|
| MMV007839                                                       | CAS 381710-03-8 |
| MMV000972                                                       | CAS 381697-69-4 |
| Pharmacophore (“5,5,6,6,6-Pentafluoro-4-hydroxyhex-3-en-2-one”) | CAS 356-40-1    |
| <b>[1]</b>                                                      | CAS 381697-82-1 |
| <b>[2]</b>                                                      | CAS 20321-73-7  |
| <b>[3]</b>                                                      | CAS 371934-47-3 |
| <b>[4]</b>                                                      | CAS 350581-84-9 |
| <b>[6]</b>                                                      | CAS 339321-85-6 |
| <b>[7]</b>                                                      | CAS 304880-80-6 |
| <b>[8]</b>                                                      | CAS 78605-63-7  |
| <b>[9]</b>                                                      | CAS 337467-33-1 |
| <b>[11]</b>                                                     | CAS 370076-22-5 |
