# Supplementary material for: Substrate-analogous inhibitors exert antimalarial action by targeting the Plasmodium lactate transporter PfFNT at nanomolar scale
Source: PubMed Central journal article supplement (PMC5298233; doi:10.1371/journal.ppat.1006172), 2017-02-08
Supplement: ppat.1006172.s005.pdf [file ppat.1006172.s005.pdf]

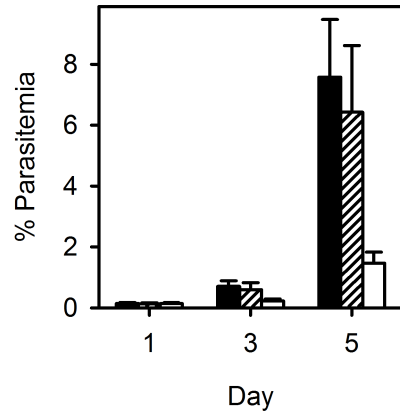

**S1 Fig.** Parasite growth without MMV007839 treatment (black bars) and after initial drug pulses for 1 h (striped bars) or over night (open bars) at the  $IC_{90}$  concentration. Parasitemia was determined at days 1, 3, and 5. Error bars indicate S.E.M. from three independent biological replicates.
