# Supplementary material for: Substrate-analogous inhibitors exert antimalarial action by targeting the Plasmodium lactate transporter PfFNT at nanomolar scale
Source: PubMed Central journal article supplement (PMC5298233; doi:10.1371/journal.ppat.1006172), 2017-02-08
Supplement: ppat.1006172.s006.pdf [file ppat.1006172.s006.pdf]

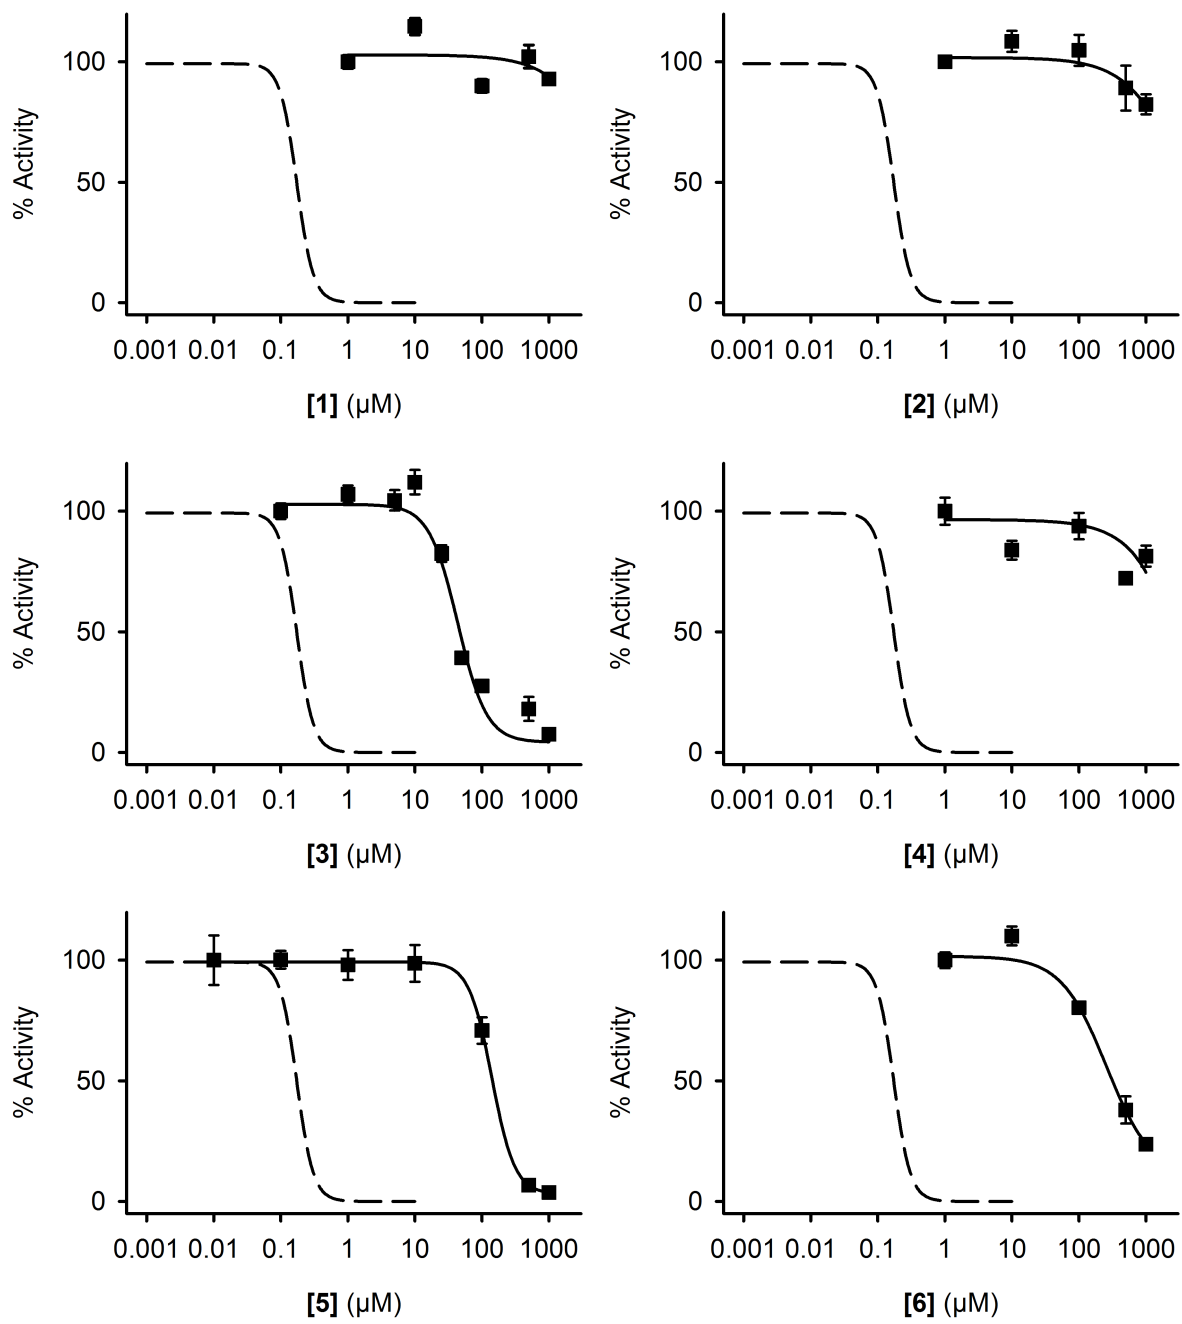

S2 Fig. ... continued on next page

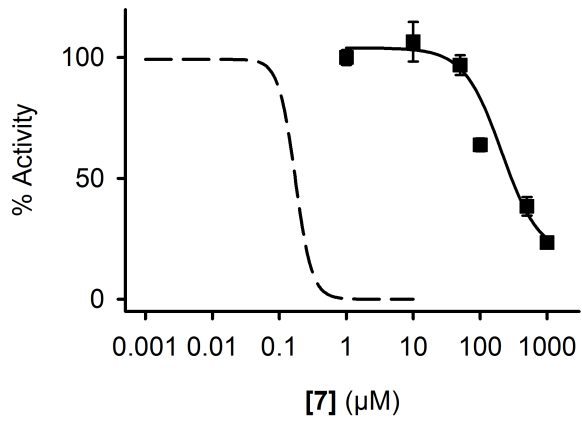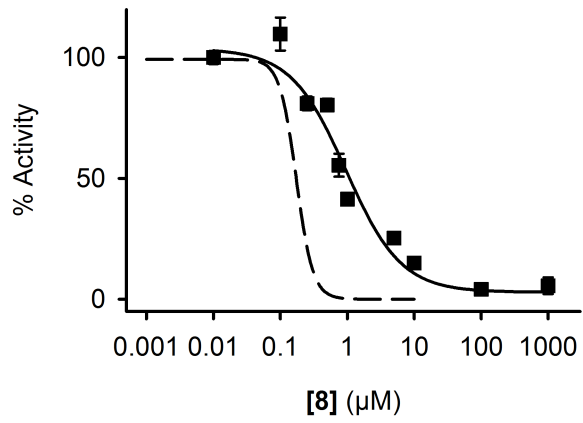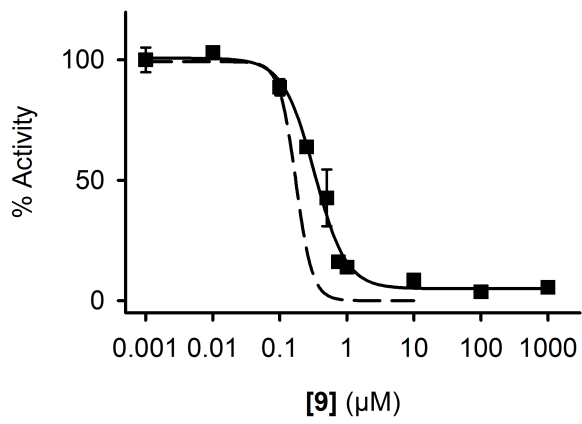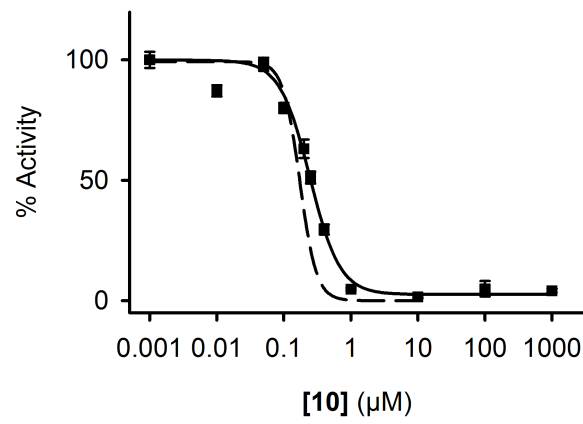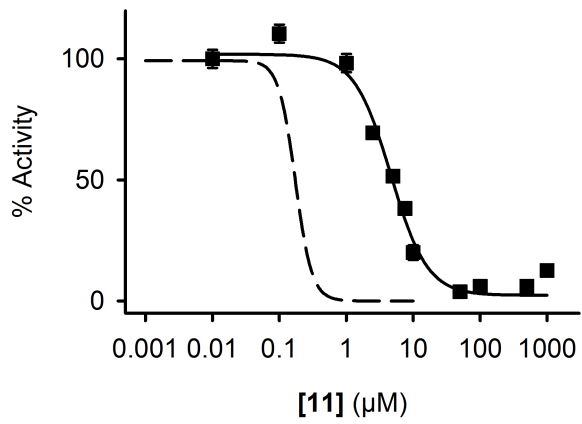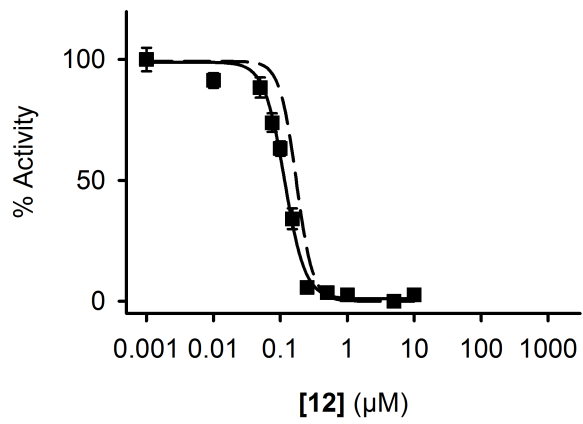

**S2 Fig. ... continued on next page**

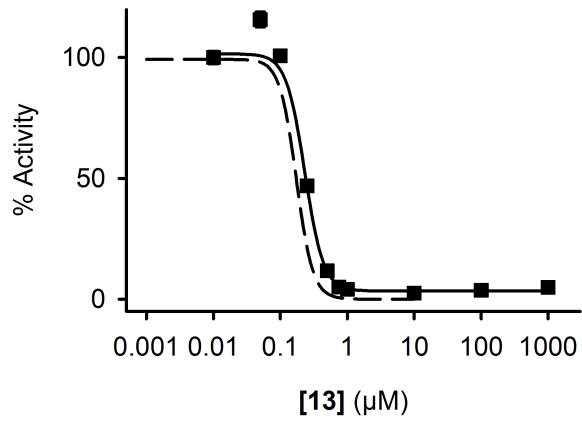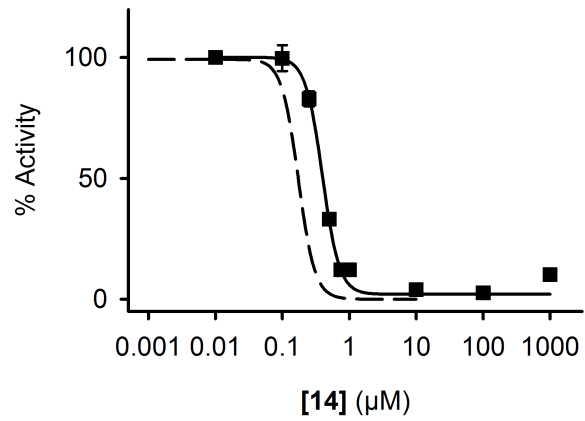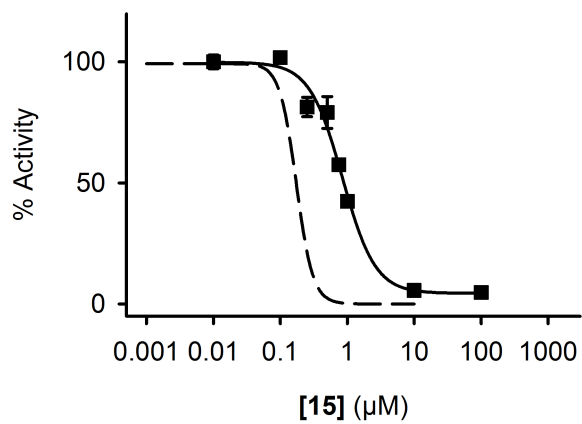

**S2 Fig.** IC<sub>50</sub> curves of PfFNT inhibitors for QSAR measured with PfFNT expressing yeast; see Fig. 3 of the main paper for compound structures. The dashed line indicates inhibition of PfFNT by MMV007839.
