# Supplementary material for: Substrate-analogous inhibitors exert antimalarial action by targeting the Plasmodium lactate transporter PfFNT at nanomolar scale
Source: PubMed Central journal article supplement (PMC5298233; doi:10.1371/journal.ppat.1006172), 2017-02-08
Supplement: ppat.1006172.s008.pdf [file ppat.1006172.s008.pdf]

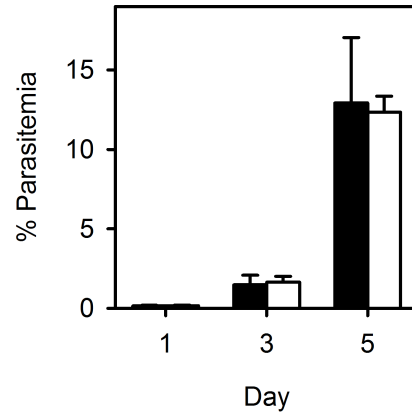

**S4 Fig.** Fitness of the MMV007839 resistant parasites (open bars) compared to 3D7 wildtype (black) in culture. The starting parasitemia was  $0.15 \pm 0.1\%$ ; error bars denote S.E.M. from three independent biological replicates.
