# Supplementary material for: Substrate-analogous inhibitors exert antimalarial action by targeting the Plasmodium lactate transporter PfFNT at nanomolar scale
Source: PubMed Central journal article supplement (PMC5298233; doi:10.1371/journal.ppat.1006172), 2017-02-08
Supplement: ppat.1006172.s010.pdf [file ppat.1006172.s010.pdf]

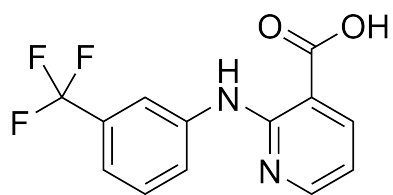

**S6 Fig.** Structure of niflumic acid, a weak inhibitor of PfFNT.
