# Supplementary material for: Substrate-analogous inhibitors exert antimalarial action by targeting the Plasmodium lactate transporter PfFNT at nanomolar scale
Source: PubMed Central journal article supplement (PMC5298233; doi:10.1371/journal.ppat.1006172), 2017-02-08
Supplement: ppat.1006172.s011.pdf [file ppat.1006172.s011.pdf]

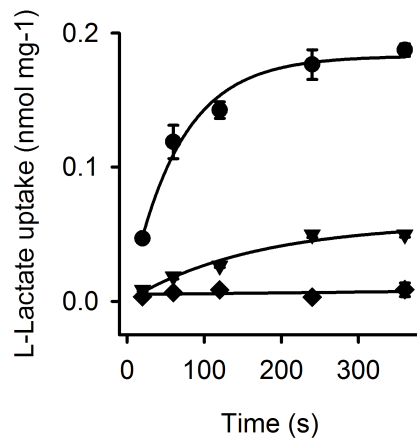

**S7 Fig.** Uptake of L-lactate via BbFNT (circles) and rat MCT1 (triangles) per milligram of dried yeast in comparison to non-expressing cells (diamonds).
